# Supplementary material
Source: PubMed Central journal article supplement (PMC3186706)
Supplement: Supp_Data.pdf [file Supp_Data.pdf]

## Supplementary Data

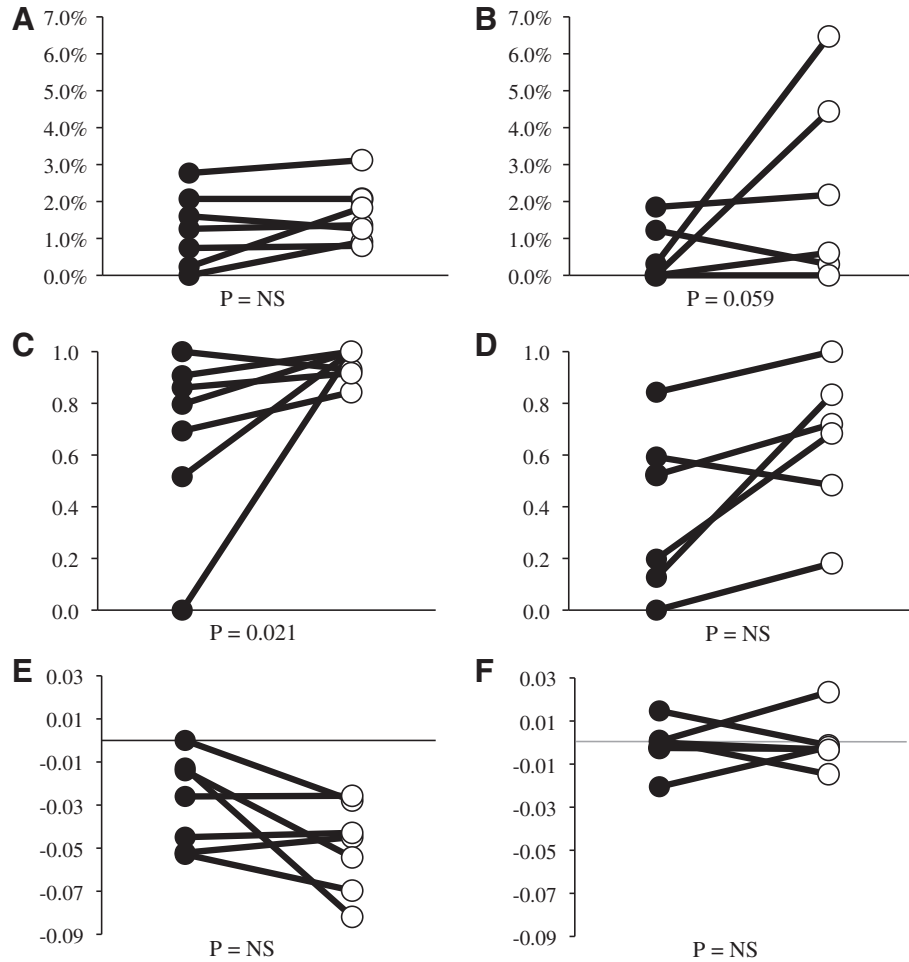

**SUPPLEMENTARY FIG. S1.** Intrapatient genetic distance (A, B), entropy (C, D), and dN-dS (E, F) values for *gag* (left panels) and *env* (right panels) nucleotide sequences in liver biopsy tissue (closed circles) and plasma (open circles). NS, not significant ( $p > 0.10$ ).
